# Supplementary material for: Paclitaxel prodrug based mixed micelles for tumor-targeted chemotherapy
Source: Royal Society of Chemistry journal article supplement (doi:10.1039/c7ra07796c), 2018-01-01
Supplement: c7ra07796c1.pdf [file c7ra07796c1.pdf]

## Supporting Information

### Paclitaxel prodrug based mixed micelles for tumor targeted chemotherapy

Dongyang Tang <sup>a</sup>, Xin Zhao <sup>b</sup>, Tie Yang <sup>c</sup>, Cheng Wang <sup>d,\*</sup>

<sup>a</sup> *Department of Experimental Center, Henan Institute of Science and Technology,*

*Xinxiang, Henan 453003, P. R. China*

<sup>b</sup> *Department of Pharmacy, Xinxiang Central Hospital, Xinxiang, Henan 453000, P. R.*

*China*

<sup>c</sup> *Nanjing Research Center, Jiangsu Chiatai Tianqing Pharmaceutical Co. Ltd,*

*Nanjing, Jiangsu 210042, P. R. China*

<sup>d</sup> *College of Pharmaceutical Sciences, Zhejiang University, 866 Yuhangtang Road,*

*Hangzhou, Zhejiang 310058, P. R. China*

\* Corresponding authors.

E-mail addresses: 11519016@zju.edu.cn (C. Wang).

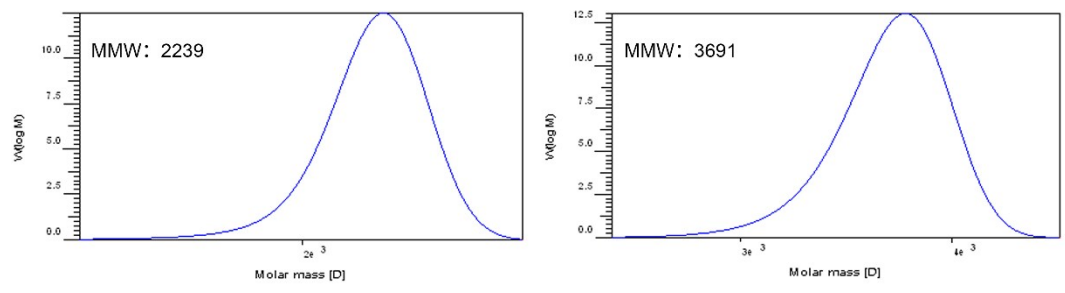

Figure S1: Normalized GPC profiles of the PEG (left) and PTX-PEG (right).

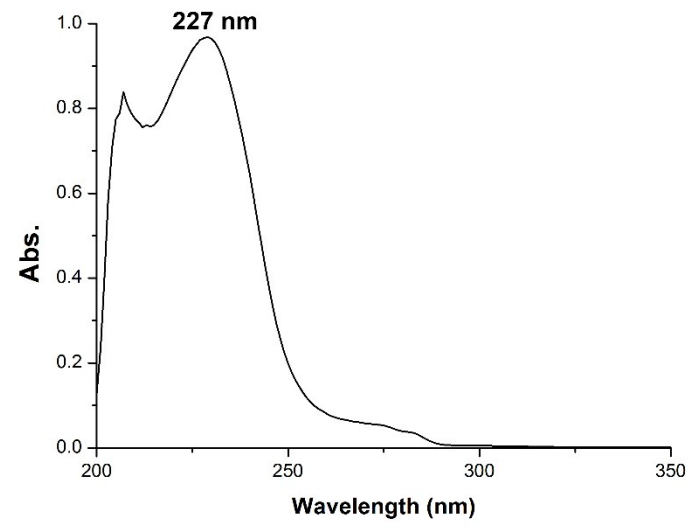

Figure S2. The UV spectrum of PTX.

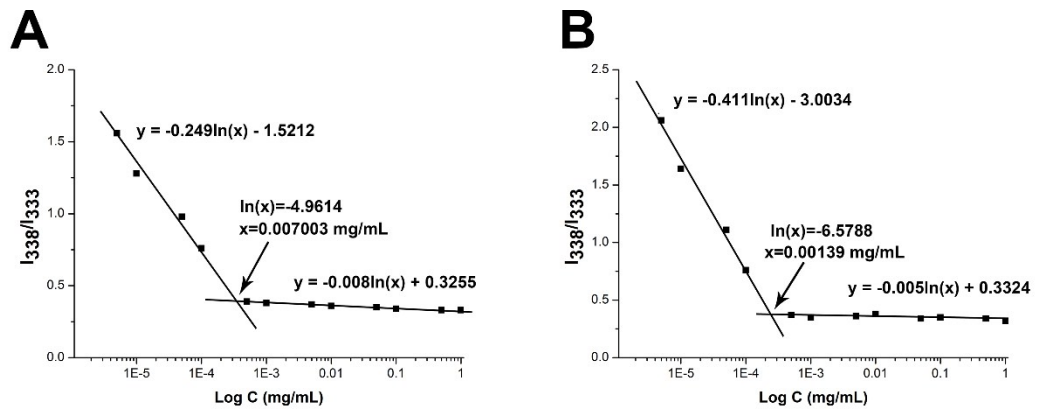

Figure S3. CMC of SMs (A) and MMs (B).

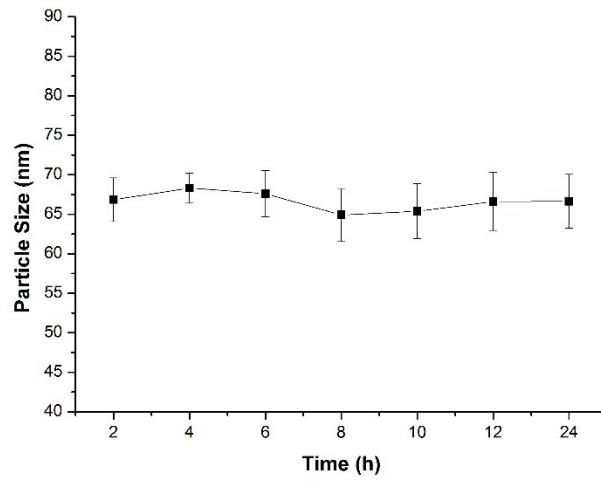

Figure S4. Colloidal stability of MMs in 50% FBS at 37 °C for up to 24 h. Data were shown as mean  $\pm$  S.D. (n =3).
